# Supplementary material for: Genome-wide detection and analysis of homologous recombination among sequenced strains of Escherichia coli
Source: PubMed Central journal article supplement (PMC1779527; doi:10.1186/gb-2006-7-5-r44), 2006-05-31
Supplement: gb-2006-7-5-r44-S2.pdf [file gb-2006-7-5-r44-S2.pdf]

| Minimal Significant |          |        | Cluster | High Scoring Segments |             |          |               |            |      |       |            |          |  |
|---------------------|----------|--------|---------|-----------------------|-------------|----------|---------------|------------|------|-------|------------|----------|--|
| K-12 start          | K-12 end | Length | Gene    | bnum                  | Gene Length | MSC span | Inter-section | Lerat List | SNPs | Score | K-12 start | K-12 end |  |
| 27810               | 27901    | 92     | rihC    | b0030                 | 914         | 91       | Insd          | KO         | 53   | 321   | 27741      |          |  |
| 27909               | 28059    | 151    |         |                       |             |          |               |            |      |       |            | 28059    |  |
| 32183               | 32657    | 475    | carB    | b0033                 | 3221        | 474      | Insd          | OS         | 109  | 301   | 32183      |          |  |
| 32735               | 33077    | 343    |         |                       |             |          |               |            |      |       |            | 33962    |  |
| 50468               | 53208    | 2741   | apaH    | b0049                 | 842         | 2740     | OvrR          | *** OS     | 148  | 102   | 50468      |          |  |
|                     |          |        | apaG    | b0050                 | 377         | 2740     | Span          |            |      |       |            |          |  |
|                     |          |        | ksgA    | b0051                 | 821         | 2740     | Span          | ***        |      |       |            |          |  |
|                     |          |        | pdxA    | b0052                 | 989         | 2740     | OvrL          |            |      |       |            | 53208    |  |
| 64277               | 64400    | 124    | polB    | b0060                 | 2351        | 123      | Insd          | KO         | 37   | 124   | 64238      | 64400    |  |
| 64520               | 65380    | 861    |         |                       | 2351        | 860      | Insd          | KS         | 86   | 190   | 64520      | 65726    |  |
| 74646               | 75114    | 469    | tbpA    | b0068                 | 983         | 468      | Insd          | KO         | 73   | 140   | 74562      | 75114    |  |
| 79012               | 79811    | 800    | leuD    | b0071                 | 605         | 799      | OvrR          | KS         | 138  | 177   | 79012      |          |  |
|                     |          |        | leuC    | b0072                 | 1400        | 799      | OvrL          |            |      |       |            | 80015    |  |
| 116889              | 117069   | 181    | hofB    | b0107                 | 1385        | 180      | Insd          | OS         | 178  | 178   | 116508     |          |  |
| 120438              | 120506   | 69     | aroP    | b0112                 | 1373        | 68       | Insd          |            |      |       |            | 120519   |  |
| 133848              | 134217   | 370    | acnB    | b0118                 | 2597        | 369      | OvrR          | KO         | 130  | 120   | 133728     | 134359   |  |
| 159488              | 159596   | 109    | yadB    | b0144                 | 926         | 108      | Insd          | KS         | 240  | 312   | 159484     | 160019   |  |
| 213038              | 213481   | 444    | tilS    | b0188                 | 1298        | 443      | Insd          | KO         | 80   | 144   | 212996     | 213481   |  |
| 219270              | 219704   | 435    | yaeB    | b0195                 | 707         | 434      | OvrR          | KS         | 253  | 203   | 216223     | 219704   |  |
|                     |          |        | rcsF    | b0196                 | 404         | 434      | OvrL          |            |      |       |            |          |  |
| 250391              | 250823   | 433    | mbhA    | b0230                 | 785         | 432      | Insd          | OS         | 59   | 102   | 250391     | 250823   |  |
| 406544              | 407113   | 570    | aroM    | b0390                 | 677         | 569      | OvrL          | KS         | 104  | 256   | 404331     | 407235   |  |
| 413193              | 413348   | 156    | sbcC    | b0397                 | 3146        | 155      | Insd          | OS         | 138  | 220   | 412826     | 413678   |  |
| 489640              | 489820   | 181    | priC    | b0467                 | 527         | 180      | Insd          | KS         | 231  | 205   | 489411     | 489820   |  |
| 501490              | 501532   | 43     | ybaL    | b0478                 | 1676        | 42       | Insd          | KO         | 110  | 274   | 501487     |          |  |
| 502036              | 502267   | 232    |         |                       |             |          |               |            |      |       |            | 503047   |  |
| 529754              | 530125   | 372    | ybbB    | b0503                 | 1094        | 371      | Insd          | KO         | 146  | 170   | 529526     | 530800   |  |
| 595235              | 596186   | 952    | cusC    | b0572                 | 1373        | 951      | Insd          | KO         | 58   | 118   | 595193     | 596186   |  |
| 608911              | 609029   | 119    | entD    | b0583                 | 629         | 118      | Insd          | OS         | 117  | 160   | 608605     | 609068   |  |
| 612294              | 613703   | 1410   | fes     | b0585                 | 1124        | 1409     | OvrR          | OS         | 114  | 113   | 612135     |          |  |
|                     |          |        | entF    | b0586                 | 3881        | 1409     | OvrL          |            |      |       |            | 613703   |  |
| 631692              | 632049   | 358    | ybdH    | b0599                 | 1088        | 357      | Insd          | OS         | 98   | 116   | 631607     | 632049   |  |

|         |         |      |      |       |      |      |      |         |     |     |         |         |
|---------|---------|------|------|-------|------|------|------|---------|-----|-----|---------|---------|
| 694604  | 694746  | 143  | ubiF | b0662 | 1175 | 142  | Insd | OS      | 50  | 151 | 694604  | 694746  |
| 711803  | 713886  | 2084 | ybfF | b0686 | 764  | 2083 | OvrR | KO      | 88  | 104 | 711803  |         |
|         |         |      | seqA | b0687 | 545  | 2083 | Span |         |     |     |         |         |
|         |         |      | pgm  | b0688 | 1640 | 2083 | OvrL |         |     |     |         | 713886  |
| 718837  | 718993  | 157  | speF | b0693 | 2198 | 156  | Insd | KS      | 39  | 242 | 718837  | 719050  |
| 719245  | 719413  |      |      |       |      |      |      | KO      |     | 173 | 719188  | 719413  |
| 723858  | 724168  | 311  | kdpC | b0696 | 572  | 310  | Insd | KO      | 116 | 103 | 723858  | 724168  |
| 770403  | 770507  | 105  |      |       |      |      |      | KS      | 18  | 207 | 770403  | 770507  |
| 771519  | 773178  | 1660 | cydA | b0733 | 1571 | 1659 | OvrR | KS      | 105 | 273 | 770605  |         |
|         |         |      | cydB | b0734 | 1139 | 1659 | OvrL |         |     |     |         | 774716  |
| 785301  | 785664  | 364  | aroG | b0754 | 1052 | 363  | Insd | OS      | 58  | 108 | 785301  | 785664  |
| 794811  | 796429  | 1619 | modA | b0763 | 773  | 1618 | OvrR | KS      | 120 | 193 | 794811  |         |
|         |         |      | modB | b0764 | 689  | 1618 | Span |         |     |     |         |         |
|         |         |      | modC | b0765 | 1058 | 1618 | OvrL |         |     |     |         | 797018  |
| 805913  | 806426  | 514  | ybhC | b0772 | 1283 | 513  | Insd | OS      | 25  | 120 | 805913  | 806426  |
| 815366  | 815588  | 223  | ybhK | b0780 | 908  | 222  | Insd | KS      | 492 | 458 | 814995  |         |
| 815591  | 816985  | 1395 | moaA | b0781 | 989  | 1394 | OvrL |         |     |     |         | 817495  |
| 842204  | 843188  | 985  | ybiN | b0807 | 1007 | 984  | OvrR | KO      | 140 | 104 | 842204  |         |
|         |         |      | ybiO | b0808 | 2360 | 984  | OvrL |         |     |     |         | 843188  |
| 853771  | 854082  | 312  | ybiR | b0818 | 1118 | 311  | OvrR | KO      | 119 | 106 | 853771  |         |
|         |         |      | ybiS | b0819 | 920  | 311  | OvrL |         |     |     |         | 854082  |
| 893275  | 893998  | 724  | potF | b0854 | 1112 | 723  | Insd | KS      | 139 | 252 | 893254  | 895067  |
| 916657  | 916714  | 58   | ybjD | b0876 | 1658 | 57   | Insd | OS      | 179 | 310 | 916273  |         |
| 916717  | 916807  | 91   |      |       |      |      |      |         |     |     |         | 916807  |
| 943833  | 944273  | 441  | dmsC | b0896 | 863  | 440  | OvrR | OS      | 88  | 136 | 943833  |         |
|         |         |      | ycaC | b0897 | 626  | 440  | OvrL |         |     |     |         | 945371  |
| 952384  | 952501  | 118  | pflB | b0903 | 2282 | 117  | Insd | OS      | 162 | 178 | 951358  |         |
| 955036  | 955168  | 133  | ycaO | b0905 | 1769 | 132  | Insd |         |     |     |         | 953356  |
| 1007967 | 1008214 | 248  | ycbY | b0948 | 2108 | 247  | Insd | KO      | 81  | 122 | 1007878 | 1008232 |
| 1018943 | 1019017 | 75   | ompA | b0957 | 1040 | 74   | Insd | KO      | 46  | 278 | 1018943 |         |
| 1019063 | 1019144 | 82   |      |       |      |      |      |         |     |     |         | 1019680 |
| 1084155 | 1084256 | 102  | phoH | b1020 | 1064 | 101  | OvrL | KO      | 56  | 384 | 1084119 |         |
| 1084265 | 1084316 | 52   |      |       |      |      |      |         |     |     |         | 1084651 |
| 1127990 | 1132308 | 4319 | mviN | b1069 | 1535 | 4318 | OvrR | **** KS | 160 | 258 | 1127681 |         |
|         |         |      | flgN | b1070 | 416  | 4318 | Span |         |     |     |         |         |
|         |         |      | flgM | b1071 | 293  | 4318 | Span |         |     |     |         |         |

|         |         |      |      |       |      |      |      |     |     |     |         |         |  |         |
|---------|---------|------|------|-------|------|------|------|-----|-----|-----|---------|---------|--|---------|
|         |         |      | flgA | b1072 | 659  | 4318 | Span |     |     |     |         |         |  |         |
|         |         |      | flgB | b1073 | 416  | 4318 | Span |     |     |     |         |         |  |         |
|         |         |      | flgC | b1074 | 404  | 4318 | Span |     |     |     |         |         |  |         |
|         |         |      | flgD | b1075 | 695  | 4318 | Span |     |     |     |         |         |  |         |
|         |         |      | flgE | b1076 | 1208 | 4318 | OvrL |     |     |     |         |         |  | 1132308 |
| 1142351 | 1142390 | 40   | rne  | b1084 | 3185 | 39   | Insd | KO  | 119 | 143 | 1141585 | 1142390 |  |         |
| 1153951 | 1154894 | 944  | yceG | b1097 | 1022 | 943  | OvrR | OS  | 122 | 110 | 1153951 |         |  |         |
|         |         |      | tmk  | b1098 | 641  | 943  | OvrL |     |     |     |         |         |  | 1155343 |
| 1280912 | 1281185 | 274  | narG | b1224 | 3743 | 273  | Insd | KS  | 141 | 223 | 1280876 | 1281323 |  |         |
| 1314158 | 1315093 | 936  | trpA | b1260 | 806  | 935  | OvrL | KS  | 416 | 443 | 1314158 |         |  |         |
| 1319366 | 1319791 | 426  | trpD | b1263 | 1595 | 425  | OvL  |     |     |     |         |         |  |         |
|         |         |      | trpE | b1264 | 1562 | 425  | OvR  |     |     |     |         |         |  | 1320726 |
| 1365045 | 1365159 | 115  | pspF | b1303 | 992  | 114  | Insd | KO  | 60  | 101 | 1365045 | 1365159 |  |         |
| 1368754 | 1368793 | 40   | ycjM | b1309 | 1706 | 39   | Insd | OS  | 53  | 141 | 1368742 | 1368793 |  |         |
| 1689270 | 1689389 | 120  | ydgA | b1614 | 1508 | 119  | OvrR | KS  | 53  | 202 | 1688108 | 1689389 |  |         |
| 1697521 | 1699267 | 1747 | malX | b1621 | 1592 | 1746 | OvrR | KS  | 116 | 179 | 1697521 |         |  |         |
|         |         |      | malY | b1622 | 1172 | 1746 | OvrL |     |     |     |         |         |  | 1699267 |
| 1706885 | 1709842 | 2958 | rnfC | b1629 | 2222 | 2957 | OvrR | KO  | 166 | 106 | 1706885 |         |  |         |
|         |         |      | rnfD | b1630 | 1058 | 2957 | Span |     |     |     |         |         |  |         |
|         |         |      | rnfG | b1631 | 620  | 2957 | Span |     |     |     |         |         |  |         |
|         |         |      | rnfE | b1632 | 695  | 2957 | Span |     |     |     |         |         |  |         |
|         |         |      | nth  | b1633 | 635  | 2957 | OvrL | *** |     |     |         |         |  | 1709842 |
| 1716454 | 1716525 | 72   | ydhH | b1640 | 1109 | 71   | OvrL | OS  | 143 | 150 | 1716440 | 1717164 |  |         |
| 1765563 | 1765617 | 55   | ydiJ | b1687 | 3056 | 54   | Insd | KO  | 57  | 152 | 1765509 | 1765617 |  |         |
| 1771703 | 1773005 | 1303 | ydiN | b1691 | 1271 | 1302 | OvrR | OS  | 82  | 125 | 1771461 |         |  |         |
|         |         |      | ydiB | b1692 | 866  | 1302 | Span |     |     |     |         |         |  |         |
|         |         |      | aroD | b1693 | 758  | 1302 | OvrL |     |     |     |         |         |  | 1773005 |
| 1821705 | 1821798 | 94   | ydjQ | b1741 | 887  | 93   | Insd | OS  | 158 | 152 | 1821705 | 1822010 |  |         |
| 1830817 | 1831014 | 198  | xthA | b1749 | 806  | 197  | Insd | KS  | 170 | 280 | 1829519 | 1831014 |  |         |
| 1838980 | 1839136 | 157  | ynjF | b1758 | 626  | 156  | Insd | KS  | 66  | 251 | 1838980 | 1839301 |  |         |
| 1850992 | 1851360 | 369  | ydjE | b1769 | 1358 | 368  | Insd | KO  | 76  | 169 | 1850306 | 1851360 |  |         |
| 1889486 | 1889942 | 457  |      |       |      |      |      | KS  | 122 | 172 | 1889486 | 1889942 |  |         |
| 1944717 | 1945449 | 733  | yebB | b1862 | 701  | 732  | OvrR | KO  |     |     |         |         |  |         |
|         |         |      | ruvC | b1863 | 521  | 732  | Span |     |     |     |         |         |  |         |
|         |         |      | yebC | b1864 | 740  | 732  | OvrL |     |     |     |         |         |  |         |
| 1951402 | 1951659 | 258  | yecO | b1870 | 743  | 257  | OvrR | KO  |     |     |         |         |  |         |

|         |                     |      |      |       |      |           |    |     |     |         |
|---------|---------------------|------|------|-------|------|-----------|----|-----|-----|---------|
| 1981435 | 1983659             | 2225 | yecP | b1871 | 971  | 257 OvrL  |    |     |     |         |
|         |                     |      | araH | b4460 | 989  | 2224 OvrR | KS | 280 | 206 | 1979715 |
|         |                     |      | araG | b1900 | 1514 | 2224 Span |    |     |     |         |
|         |                     |      | araF | b1901 | 989  | 2224 OvrL |    |     |     | 1984062 |
| ****    | The Atypical Region |      |      |       |      |           |    |     |     |         |
|         |                     | 478  | sdiA | b1916 | 722  | 477       |    |     |     |         |
|         |                     | 258  |      |       | 722  | 257       |    |     |     |         |
|         |                     | 604  | fliY | b1920 | 800  | 603       |    |     |     |         |
|         |                     | 298  | fliT | b1926 | 365  | 297       |    |     |     |         |
|         |                     | 238  | amyA | b1927 | 1487 | 237       |    |     |     |         |
|         |                     | 227  | -    | b1936 | 278  | 226       |    |     |     |         |
|         |                     | 227  | fliE | b1937 | 314  | 226       |    |     |     |         |
|         |                     | 126  | fliH | b1940 | 707  | 125       |    |     |     |         |
|         |                     | 601  | fliI | b1941 | 1373 | 600       |    |     |     |         |
|         |                     | 286  | fliN | b1946 | 413  | 285       |    |     |     |         |
|         |                     | 442  | fliP | b1948 | 737  | 441       |    |     |     |         |
|         |                     | 388  | fliR | b1950 | 785  | 387       |    |     |     |         |
|         |                     | 574  | rcaA | b1951 | 623  | 573       |    |     |     |         |
|         |                     | 302  | yedP | b1955 | 815  | 301       |    |     |     |         |
|         |                     | 415  | yedQ | b1956 | 1709 | 414       |    |     |     |         |
|         |                     | 715  | yodC | b1957 | 182  | 714       |    |     |     |         |
|         |                     | 4    | yedA | b1959 | 920  | 3         |    |     |     |         |
|         |                     | 460  | dcm  | b1961 | 1418 | 459       |    |     |     |         |
|         |                     | 361  | yedU | b1967 | 851  | 360       |    |     |     |         |
|         |                     | 253  | yedV | b1968 | 1358 | 252       |    |     |     |         |
|         |                     | 298  | yedX | b1970 | 413  | 297       |    |     |     |         |
|         |                     | 668  | yedY | b1971 | 1004 | 667       |    |     |     |         |
|         |                     | 98   | yedZ | b1972 | 635  | 97        |    |     |     |         |
|         |                     | 259  | yodA | b1973 | 650  | 258       |    |     |     |         |
|         |                     | 490  | yeeI | b1976 | 836  | 489       |    |     |     |         |
|         |                     | 292  | amn  | b1982 | 1454 | 291       |    |     |     |         |
|         |                     | 760  | yeeN | b1983 | 716  | 759       |    |     |     |         |
|         |                     | 509  | yeeO | b1985 | 1643 | 508       |    |     |     |         |
|         |                     | 691  | cbl  | b1987 | 950  | 690       |    |     |     |         |
|         |                     | 691  | nac  | b1988 | 917  | 690       |    |     |     |         |
|         |                     | 272  | erfK | b1990 | 932  | 271       |    |     |     |         |



|         |         |      |      |       |      |      |      |     |     |     |         |         |         |
|---------|---------|------|------|-------|------|------|------|-----|-----|-----|---------|---------|---------|
| 2396135 | 2396360 | 226  | nuoG | b2283 | 2732 | 225  | Insd | OS  | 56  | 119 | 2396135 | 2396387 |         |
| 2426850 | 2427804 | 955  | purF | b2312 | 1517 | 954  | Insd | KS  | 70  | 228 | 2426543 | 2427981 |         |
| 2440958 | 2441323 | 366  | -    | b2324 | 2066 | 365  | Insd | KS  | 440 | 246 | 2440636 | 2441767 |         |
| 2482733 | 2483117 | 385  | evgS | b2370 | 3593 | 384  | Insd | KS  | 634 | 820 | 2482733 |         |         |
| 2483545 | 2484134 | 590  |      |       |      |      |      |     |     |     |         |         |         |
| 2484419 | 2484524 | 106  |      |       |      |      |      |     |     |     |         |         |         |
| 2488826 | 2490805 | 1980 | yfdU | b2373 | 1694 | 1979 | OvrR |     |     |     |         |         |         |
|         |         |      | yfdW | b2374 | 1250 | 1979 | OvrL |     |     |     |         | 2492111 |         |
| 2496433 | 2496538 | 106  |      |       |      |      |      | KO  | 40  | 121 | 2496433 | 2496588 |         |
| 2497381 | 2498754 | 1374 | ypdA | b2380 | 1697 | 1373 | OvrR | KS  | 317 | 276 | 2497381 | 2501661 |         |
|         |         |      | ypdB | b2381 | 734  | 1373 | OvrL |     |     |     |         |         |         |
| 2500257 | 2501661 | 1405 | ypdD | b2383 | 2495 | 1404 | Insd |     |     |     |         |         |         |
| 2517242 | 2518412 | 1171 | gltX | b2400 | 1415 | 1170 | OvrL | *** | KS  | 53  | 216     | 2517242 | 2518802 |
| 2538203 | 2538290 | 88   | cysA | b2422 | 1097 | 87   | Insd | KO  | 113 | 102 | 2538203 | 2538290 |         |
| 2539365 | 2540012 | 648  | cysU | b2424 | 833  | 647  | OvrL | KS  | 104 | 174 | 2539365 | 2540012 |         |
| 2549048 | 2549547 | 500  | yfeY | b2432 | 575  | 499  | OvrR | KO  | 92  | 113 | 2548971 | 2549547 |         |
|         |         |      | yfeZ | b2433 | 455  | 499  | OvrL |     |     |     |         |         |         |
| 2577878 | 2578703 | 826  | tktB | b2465 | 2003 | 825  | Insd | KS  | 94  | 208 | 2577878 | 2579387 |         |
| 2631069 | 2631372 | 304  | guaB | b2508 | 1466 | 303  | Insd | OS  | 164 | 126 | 2630826 | 2631426 |         |
| 2656345 | 2656738 | 394  | hscA | b2526 | 1850 | 393  | Insd | KO  | 78  | 119 | 2656345 | 2657261 |         |
| 2673624 | 2674019 | 396  | yphC | b2545 | 1094 | 395  | OvrR | KS  | 198 | 210 | 2673624 | 2674181 |         |
|         |         |      | yphD | b2546 | 998  | 395  | OvrL |     |     |     |         |         |         |
| 2688733 | 2689535 | 803  | yfhK | b2556 | 1490 | 802  | OvrR | OS  | 49  | 106 | 2688733 | 2689535 |         |
|         |         |      | ??   | b4441 | 148  | 802  | Span |     |     |     |         |         |         |
| 2695690 | 2696331 | 642  | tadA | b2559 | 536  | 641  | OvrR | KS  | 70  | 227 | 2695681 | 2697520 |         |
|         |         |      | yfhB | b2560 | 572  | 641  | OvrL | KS  | 319 | 645 | 2697876 | 2698684 |         |
| 2698155 | 2698552 | 398  |      |       |      |      |      |     |     |     |         |         |         |
| 2699661 | 2700517 | 857  | pdxJ | b2564 | 731  | 856  | OvrR | KO  | 127 | 113 | 2699661 | 2700889 |         |
|         |         |      | recO | b2565 | 728  | 856  | Span |     |     |     |         |         |         |
|         |         |      | era  | b2566 | 905  | 856  | OvrL |     |     |     |         |         |         |
| 2709565 | 2710024 | 460  | nadB | b2574 | 1622 | 459  | Insd | KO  | 71  | 134 | 2708886 | 2710024 |         |
| 2710558 | 2711627 | 1070 | yfiC | b2575 | 857  | 1069 | OvrR | OS  | 70  | 102 | 2710558 | 2711627 |         |
|         |         |      | srmB | b2576 | 1334 | 1069 | OvrL |     |     |     |         |         |         |
| 2792079 | 2792594 | 516  | gabP | b2663 | 1400 | 515  | OvrL | KO  | 165 | 179 | 2791841 | 2792630 |         |
| 2800301 | 2800970 | 670  |      | b2675 | 2144 | 669  | Insd | KO  | 124 | 124 | 2800118 | 2800970 |         |
| 2806623 | 2808012 | 1390 | -    | b2681 | 917  | 1389 | OvrR | OS  | 88  | 105 | 2806623 | 2808012 |         |

|         |         |      |      |       |      |      |      |     |     |     |         |         |  |  |  |  |  |  |         |
|---------|---------|------|------|-------|------|------|------|-----|-----|-----|---------|---------|--|--|--|--|--|--|---------|
|         |         |      | ygaZ | b2682 | 737  | 1389 | OvrL |     |     |     |         |         |  |  |  |  |  |  |         |
| 2816836 | 2817920 | 1085 | csrA | b2696 | 185  | 1084 | Span | OS  | 74  | 138 | 2816836 | 2818296 |  |  |  |  |  |  |         |
|         |         |      | alaS | b2697 | 2630 | 1084 | OvrL | *** |     |     |         |         |  |  |  |  |  |  |         |
| 2822179 | 2822734 | 556  | ygaD | b2700 | 497  | 555  | OvrR | KS  | 333 | 230 | 2822179 | 2826441 |  |  |  |  |  |  |         |
|         |         |      | mltB | b2701 | 1085 | 555  | OvrL |     |     |     |         |         |  |  |  |  |  |  |         |
| 2829735 | 2830215 | 481  | ygaA | b2709 | 1589 | 480  | Insd | KS  | 68  | 181 | 2829735 | 2830215 |  |  |  |  |  |  |         |
| 2855806 | 2856025 | 220  | mutS | b2733 | 2561 | 219  | Insd | KO  | 92  | 176 | 2855665 | 2856025 |  |  |  |  |  |  |         |
| 2857015 | 2857216 | 202  |      |       | 2561 | 201  | Insd | KS  | 188 | 229 | 2856172 | 2857606 |  |  |  |  |  |  |         |
| 2857996 | 2858044 | 49   | pphB | b2734 | 656  | 48   | Insd | OS  | 42  | 115 | 2857995 | 2858044 |  |  |  |  |  |  |         |
| 2885479 | 2886097 | 619  | cysH | b2762 | 734  | 618  | OvrL | KO  | 125 | 133 | 2885477 | 2886133 |  |  |  |  |  |  |         |
| 2887764 | 2887877 | 114  | cysI | b2763 | 1712 | 113  | Insd | OS  | 61  | 118 | 2887518 | 2887877 |  |  |  |  |  |  |         |
| 2892468 | 2892897 | 430  | ygcP | b2768 | 575  | 429  | OvrR | OS  | 94  | 115 | 2892468 | 2892949 |  |  |  |  |  |  |         |
| 2955379 | 2955757 | 379  | ptr  | b2821 | 2888 | 378  | Insd | KS  | 216 | 243 | 2955379 |         |  |  |  |  |  |  |         |
| 2959033 | 2959700 | 668  | recC | b2822 | 3368 | 667  | Insd |     |     |     |         |         |  |  |  |  |  |  | 2956039 |
| 3037483 | 3040087 | 2605 | xerD | b2894 | 896  | 2604 | OvrR | KS  | 95  | 197 | 3037483 |         |  |  |  |  |  |  |         |
|         |         |      | fldB | b2895 | 521  | 2604 | Span |     |     |     |         |         |  |  |  |  |  |  |         |
|         |         |      | ygfX | b2896 | 407  | 2604 | Span |     |     |     |         |         |  |  |  |  |  |  |         |
|         |         |      | ygfY | b2897 | 266  | 2604 | Span |     |     |     |         |         |  |  |  |  |  |  |         |
|         |         |      | ygfZ | b2898 | 980  | 2604 | OvrL |     |     |     |         |         |  |  |  |  |  |  | 3040290 |
| 3054888 | 3055427 | 540  |      | b4446 | 150  | 539  | OvrR | OS  | 67  | 111 | 3054888 |         |  |  |  |  |  |  |         |
|         |         |      | serA | b2913 | 1232 | 539  | OvrL |     |     |     |         |         |  |  |  |  |  |  | 3055718 |
| 3065823 | 3066533 | 711  | yggE | b2922 | 740  | 710  | OvrR | OS  | 68  | 260 | 3065472 |         |  |  |  |  |  |  |         |
|         |         |      | yggA | b2923 | 635  | 710  | OvrL |     |     |     |         |         |  |  |  |  |  |  |         |
| 3066623 | 3066920 | 298  |      |       |      |      |      |     |     |     |         |         |  |  |  |  |  |  | 3067574 |
| 3078508 | 3078811 | 304  | tktA | b2935 | 1991 | 303  | Insd | OS  | 85  | 106 | 3078508 | 3078811 |  |  |  |  |  |  |         |
| 3086049 | 3086697 | 649  | galP | b2943 | 1394 | 648  | OvrL | KO  | 70  | 115 | 3086049 | 3086697 |  |  |  |  |  |  |         |
| 3092781 | 3092871 | 91   | yggR | b2950 | 1025 | 90   | Insd | KO  | 58  | 143 | 3092781 | 3092871 |  |  |  |  |  |  |         |
| 3107479 | 3107525 | 47   |      |       |      |      |      | OS  | 30  | 103 | 3107479 | 3107525 |  |  |  |  |  |  |         |
| 3150361 | 3150535 | 175  | metC | b3008 | 1187 | 174  | Insd | OS  | 128 | 157 | 3150361 | 3151435 |  |  |  |  |  |  |         |
| 3157365 | 3157686 | 322  | ygiQ | b4469 | 2219 | 321  | Insd | OS  | 82  | 133 | 3157365 | 3157686 |  |  |  |  |  |  |         |
| 3173190 | 3173881 | 692  | parE | b3030 | 1892 | 691  | OvrR | KO  | 66  | 117 | 3173064 |         |  |  |  |  |  |  |         |
|         |         |      | yqiA | b3031 | 581  | 691  | OvrL |     |     |     |         |         |  |  |  |  |  |  | 3173881 |
| 3193548 | 3193680 | 133  | rfaE | b3052 | 1433 | 132  | Insd | KO  | 101 | 104 | 3193548 | 3193761 |  |  |  |  |  |  |         |
| 3195707 | 3195878 | 172  | glnE | b3053 | 2840 | 171  | Insd | KO  | 183 | 195 | 3195647 | 3196208 |  |  |  |  |  |  |         |
| 3217880 | 3218417 | 538  | ygjG | b3073 | 1490 | 537  | Insd | OS  | 125 | 127 | 3217859 | 3218417 |  |  |  |  |  |  |         |
| 3222285 | 3222879 | 595  | ebgA | b3076 | 3092 | 594  | Insd | KS  | 130 | 225 | 3221757 | 3222879 |  |  |  |  |  |  |         |

|         |         |      |      |       |      |           |     |  |    |     |     |         |         |
|---------|---------|------|------|-------|------|-----------|-----|--|----|-----|-----|---------|---------|
| 3265686 | 3265744 | 59   |      |       |      |           |     |  | KO | 27  | 128 | 3265686 | 3265744 |
| 3302942 | 3304043 | 1102 | mtr  | b3161 | 1244 | 1101 OvrR |     |  | KO | 108 | 105 | 3302942 |         |
|         |         |      | deaD | b3162 | 1940 | 1101 OvrL |     |  |    |     |     |         | 3304043 |
| 3320864 | 3320979 | 116  | glmM | b3176 | 1337 | 115 Insd  |     |  | KS | 180 | 263 | 3320864 | 3324171 |
| 3355874 | 3356426 | 553  | gltB | b3212 | 4553 | 552 Insd  |     |  | KO | 161 | 118 | 3355442 | 3356426 |
| 3419785 | 3420597 | 813  | yhdY | b3270 | 1106 | 812 OvrR  |     |  | KO | 65  | 101 | 3419785 |         |
|         |         |      | yhdZ | b3271 | 758  | 812 OvrL  |     |  |    |     |     |         | 3420597 |
| 3430138 | 3430351 | 214  | smg  | b3284 | 473  | 213 Insd  |     |  | KS | 180 | 317 | 3426691 | 3430672 |
| 3493780 | 3494548 | 769  | nirB | b3365 | 2543 | 768 Insd  |     |  | KO | 138 | 146 | 3493780 | 3495194 |
| 3519180 | 3519937 | 758  | yrfB | b3393 | 440  | 757 OvrR  |     |  | KS | 435 | 319 | 3510784 |         |
|         |         |      | yrfC | b3394 | 539  | 757 OvrL  |     |  |    |     |     |         | 3519937 |
| 3536917 | 3537593 | 677  | yhgF | b3407 | 2222 | 676 Insd  |     |  | OS | 63  | 124 | 3536635 | 3537754 |
| 3552671 | 3552839 | 169  | malT | b3418 | 2705 | 168 Insd  |     |  | OS | 66  | 107 | 3552671 | 3553193 |
| 3561021 | 3561282 | 262  | glpD | b3426 | 1505 | 261 Insd  |     |  | KO | 57  | 109 | 3561021 | 3561282 |
| 3584065 | 3584693 | 629  | ggT  | b3447 | 1742 | 628 Insd  |     |  | KS | 65  | 202 | 3583883 |         |
| 3606869 | 3607457 | 589  | sirA | b3470 | 245  | 588 OvrR  |     |  |    |     |     |         | 3584747 |
|         |         |      | yhhQ | b3471 | 665  | 588 OvrL  |     |  | KS | 166 | 320 | 3606765 |         |
| 3614669 | 3615363 | 695  | nikC | b3478 | 833  | 694 OvrR  |     |  |    |     |     |         | 3609546 |
|         |         |      | nikD | b3479 | 764  | 694 OvrL  |     |  | KS | 206 | 239 | 3614383 | 3615911 |
| 3679057 | 3684376 | 5320 | yhjJ | b3527 | 1496 | 5319 OvrR |     |  | KS | 190 | 173 | 3679057 |         |
|         |         |      | dctA | b3528 | 1286 | 5319 Span |     |  |    |     |     |         |         |
|         |         |      | yhjK | b3529 | 1955 | 5319 Span |     |  |    |     |     |         |         |
|         |         |      | yhjL | b3530 | 3422 | 5319 OvrL |     |  |    |     |     |         | 3684832 |
| 3721289 | 3721394 | 106  | glyS | b3559 | 2069 | 105 Insd  | *** |  | OS | 143 | 179 | 3720653 | 3721478 |
| 3732275 | 3732797 | 523  | xylH | b3568 | 1181 | 522 Insd  |     |  | KS | 76  | 226 | 3732054 | 3733837 |
| 3755843 | 3756747 | 905  | yiaY | b3589 | 1151 | 904 OvrR  |     |  | OS | 77  | 120 | 3755843 | 3756747 |
| 3773387 | 3773434 | 48   | selB | b3590 | 1844 | 904 OvrL  |     |  | OS | 75  | 171 | 3773246 | 3773434 |
| 3779988 | 3780132 | 145  | mtlD | b3600 | 1148 | 47 Insd   |     |  | OS | 309 | 189 | 3779683 |         |
| 3783097 | 3783935 | 839  | cysE | b3607 | 821  | 144 Insd  |     |  |    |     |     |         |         |
| 3789683 | 3790136 | 454  | yibO | b3612 | 1544 | 838 OvrL  |     |  |    |     |     |         | 3784997 |
| 3815811 | 3815844 | 34   | kbl  | b3617 | 1196 | 453 Insd  |     |  | KO | 53  | 120 | 3789683 | 3790202 |
| 3818503 | 3818564 | 62   | dinD | b3645 | 836  | 33 Insd   |     |  | KS | 29  | 350 | 3815811 | 3815866 |
| 3824658 | 3824941 | 284  | yicF | b3647 | 1688 | 61 Insd   |     |  | KO | 107 | 114 | 3817312 | 3818564 |
| 3824974 | 3825142 | 169  | recG | b3652 | 2081 | 283 Insd  |     |  | OS | 33  | 116 | 3824545 | 3824941 |
|         |         |      |      | b3652 | 2081 | 168 Insd  |     |  | KS | 24  | 234 | 3824974 | 3825142 |
| 3831783 | 3833355 | 1573 | yicI | b3656 | 2318 | 1572 OvrR |     |  | KS | 128 | 283 | 3830436 |         |





|         |         |      |      |       |      |           |    |     |     |         |         |
|---------|---------|------|------|-------|------|-----------|----|-----|-----|---------|---------|
| 4200742 | 4202298 | 1557 | zraS | b4003 | 1397 | 1556 OvrR | KS | 270 | 214 | 4200742 |         |
|         |         |      | zraR | b4004 | 1325 | 1556 OvrL |    |     |     |         |         |
| 4203201 | 4203816 | 616  | purD | b4005 | 1289 | 615 Insd  |    |     |     |         | 4203816 |
| 4281350 | 4281575 | 226  | actP | b4067 | 1649 | 225 Insd  | KO | 47  | 104 | 4281350 | 4281575 |
| 4281860 | 4283077 | 1218 |      | b4067 | 1649 | 1217 OvrR | KS | 93  | 212 | 4281686 | 4283077 |
|         |         |      | yjcH | b4068 | 314  | 1217 OvrL | KS | 125 | 199 | 4386769 |         |
| 4386769 | 4387825 | 1057 | yjeP | b4159 | 3323 | 1056 OvrR |    |     |     |         |         |
|         |         |      | psd  | b4160 | 968  | 1056 OvrL |    |     |     |         | 4388797 |
| 4416990 | 4417578 | 589  | yjfR | b4192 | 1070 | 588 Insd  | KO | 135 | 132 | 4415186 | 4417578 |
| 4418313 | 4418403 | 91   | sgaT | b4193 | 1454 | 90 Insd   | KO | 308 | 435 | 4417966 |         |
| 4418487 | 4418718 | 232  |      |       |      |           |    |     |     |         |         |
| 4419978 | 4420465 | 488  | ptxA | b4195 | 464  | 487 OvrR  |    |     |     |         |         |
|         |         |      | sgaH | b4196 | 650  | 487 OvrL  |    |     |     |         | 4420819 |
| 4430428 | 4430593 | 166  | ytfF | b4210 | 974  | 165 Insd  | KO | 90  | 134 | 4430409 | 4431261 |
| 4449322 | 4449636 | 315  | ytfR | b4485 | 1502 | 314 Insd  | KO | 116 | 131 | 4449322 | 4450053 |
| 4464876 | 4465744 | 869  | treR | b4241 | 947  | 868 OvrR  | KO | 237 | 658 | 4464564 |         |
|         |         |      | mgtA | b4242 | 2696 | 868 OvrL  |    |     |     |         |         |
| 4465895 | 4466108 | 214  |      |       |      |           |    |     |     |         |         |
| 4466114 | 4466628 | 515  |      |       |      |           |    |     |     |         |         |
| 4466867 | 4468061 | 1195 |      |       |      |           |    |     |     |         |         |
| 4468163 | 4468368 | 206  |      |       |      |           |    |     |     |         |         |
| 4469338 | 4469896 | 559  | pyrI | b4244 | 461  | 558 OvrR  |    |     |     |         |         |
|         |         |      | pyrB | b4245 | 935  | 558 OvrL  |    |     |     |         | 4469896 |
| 4486901 | 4487030 | 130  | yjgR | b4263 | 1502 | 129 Insd  | KO | 118 | 130 | 4486643 | 4487030 |
| 4538498 | 4538826 | 329  |      |       |      |           | KO | 90  | 106 | 4538498 | 4538826 |
| 4623864 | 4624660 | 797  | serB | b4388 | 968  | 796 OvrR  | KO | 69  | 115 | 4623864 |         |
|         |         |      | sms  | b4389 | 1382 | 796 OvrL  |    |     |     |         | 4624695 |
| 4626218 | 4626503 | 286  |      |       |      |           | KO | 69  | 187 | 4625456 | 4626503 |

total MSC length 128515
